# Supplementary material
Source: PubMed Central journal article supplement (PMC4933636)
Supplement: supp_4.2.E213_2015-0045_original_submission_new.pdf [file supp_4.2.E213_2015-0045_original_submission_new.pdf]

1  
2  
3  
4 TITLE Health Services and Policy Research in the First Decade at the Canadian Institutes  
5  
6 of Health Research  
7  
8  
9

10 RUNNING HEAD: Health Services Research Funding at CIHR  
11  
12  
13  
14

15  
16 AUTHORS Robyn Tamblyn, PhD<sup>1</sup> ([rtamblyn.ihspr@mcgill.ca](mailto:rtamblyn.ihspr@mcgill.ca)), Meghan McMahon, MSc<sup>2</sup>  
17  
18 ([mmcmahon.ihspr@mcgill.ca](mailto:mmcmahon.ihspr@mcgill.ca)), Nadyne Girard, MSc<sup>1</sup> ([nadyne.girard@mcgill.ca](mailto:nadyne.girard@mcgill.ca)),  
19  
20 Elizabeth Drake, MHA<sup>3</sup>, ([elizabeth.drake@cihr-irsc.gc.ca](mailto:elizabeth.drake@cihr-irsc.gc.ca)), Jessica Nadigel, PhD<sup>1</sup>  
21  
22 ([jnadigel.ihspr@mcgill.ca](mailto:jnadigel.ihspr@mcgill.ca)), Kim Gaudreau<sup>4</sup> ([kim.gaudreau@cihr-irsc.gc.ca](mailto:kim.gaudreau@cihr-irsc.gc.ca))  
23  
24  
25  
26  
27

#### 28 AUTHOR AFFILIATIONS 29

30  
31 <sup>1</sup>Institute of Health Services and Policy Research, Canadian Institutes of Health  
32  
33 Research, Montreal, QC, Canada;  
34

35  
36 <sup>2</sup>Institute of Health Services and Policy Research, Canadian Institutes of Health  
37  
38 Research, Toronto ON, Canada;  
39

40  
41 <sup>3</sup>Institute of Health Services and Policy Research, Canadian Institutes of Health  
42  
43 Research, Ottawa ON, Canada;  
44

45  
46 <sup>4</sup>Data and Statistics, Canadian Institutes of Health Research, Ottawa ON, Canada;  
47  
48  
49

#### 50 CORRESPONDING AUTHOR: 51

52  
53 Robyn Tamblyn, PhD, CIHR-IHSPR, 3666 McTavish, Montreal Quebec, Canada, H3A 1Y2.  
54

55  
56 Phone: (514) 398-5940, email: [rtamblyn.ihspr@mcgill.ca](mailto:rtamblyn.ihspr@mcgill.ca)  
57  
58  
59  
60

## ABSTRACT

## Background

Health service and policy research (HSPR) is the innovation engine of a health care system. In 2000, the Canadian Institutes of Health Research (CIHR) was formed to foster the growth of all sciences that could improve health care. We evaluated trends in HSPR funding, as well as determinants of funding success.

## Methods

Between 2001-2011, 80,163 applications were submitted to the open and strategic grant competitions. Age, sex, size of research team, critical mass, season, year, and research discipline was retrieved from application information. A cohort of 4,725 applicants successfully funded between 2001-2005 were followed for 5 years to evaluate predictors of continuous funding. Multivariate GEE logistic regression was used to estimate predictors of funding success, and sustained funding.

## Results

Over time, HSPR grant applications increased from 327 to 1,137, and annual funding from \$16.0 to \$57.3 million. Grant applications from young male HSPR scientists were 40% more likely to be funded than females (OR 1.40; 95% CI: 1.01, 1.95), as were applications from larger research teams and institutions with a greater critical mass. Only 24.0% of scientists whose first funded grant was in HSPR had sustained 5-year

1  
2  
3 funding compared to 52.8% of biomedical scientists (OR 0.34; 95%CI: 0.24, 0.49;  
4  
5  
6 p<0.0001).  
7  
8  
9

#### 10 Interpretation

11  
12 CIHR has successfully increased the amount of HSPR in Canada. To enhance conditions  
13  
14 for success, HSPR scientists should be encouraged to work in teams, request longer  
15  
16 duration grants, resubmit unsuccessful applications, and affiliate with institutions with a  
17  
18 greater critical mass.  
19  
20  
21  
22  
23  
24  
25  
26  
27  
28  
29  
30  
31  
32  
33  
34  
35  
36  
37  
38  
39  
40  
41  
42  
43  
44  
45  
46  
47  
48  
49  
50  
51  
52  
53  
54  
55  
56  
57  
58  
59  
60

Confidential

## INTRODUCTION

1  
2  
3  
4  
5  
6  
7  
8 Health service and policy research is the innovation engine of an effective health care  
9  
10 system. Canada officially acknowledged the need for health services research in 1969  
11  
12 when the federal government initiated the National Health Research Grant Program  
13  
14 (NHRDP) [1]. Although the Medical Research Council and the Public Health Research and  
15  
16 Development Program had already been established to support basic biomedical and  
17  
18 communicable diseases research, it was recognized that a variety of factors influenced  
19  
20 well-being that needed to be addressed through NHRDP-supported research on health  
21  
22 system design and delivery. The farsightedness of this policy direction is echoed four  
23  
24 decades later as countries grapple with the increasing prevalence of chronic disease [2],  
25  
26 the need for interventions for lifestyle determinants of poor health [3], as well as  
27  
28 effective strategies to support chronic disease management [4].  
29  
30  
31  
32  
33  
34  
35  
36  
37

38 In 2000, the Medical Research Council and NHRDP were merged to form the Canadian  
39  
40 Institutes of Health Research (CIHR); an exciting and ambitious experiment to foster  
41  
42 growth of all sciences that were key to improved health for Canadians, more effective  
43  
44 health services and products, and a stronger Canadian health care system [5]. CIHR  
45  
46 aimed to foster a new generation of interdisciplinary collaborative research through the  
47  
48 creation of health research institutes, and by funding the spectrum of research  
49  
50 disciplines: bio-medical research, clinical research, research respecting health systems,  
51  
52 health services, the health of populations, societal and cultural dimensions of health,  
53  
54  
55  
56  
57  
58  
59  
60

1  
2  
3  
4 and environmental influences on health. Health services and policy research (HSPR) was  
5  
6 one of the thirteen founding institutes at CIHR [5]. Each Institute manages a strategic  
7  
8 allocation of funding that is used to address emerging priorities and gaps in science that  
9  
10 are relevant to the health of Canadians from their respective areas of science, such as  
11  
12 aging, genetics, aboriginal health and infection and immunity. However, the majority of  
13  
14 research funding is allocated to an open competition that aims to fund the best science  
15  
16 and researchers by assessment of excellence by peers. While the outcomes of this  
17  
18 ambitious initiative are still unfolding, it is possible to assess the impact this new entity  
19  
20 on the funding of health services and policy research in Canada.  
21  
22  
23  
24

25  
26  
27  
28 The aim of this study was to estimate funding trends in health services and policy  
29  
30 research at CIHR compared to the biomedical, clinical, and population health  
31  
32 communities [6]; the determinants of funding success in the open competition, and the  
33  
34 factors associated with sustained funding among the first cohort of successful  
35  
36 applicants.  
37  
38  
39  
40  
41  
42  
43  
44  
45  
46  
47  
48  
49  
50  
51  
52  
53  
54  
55  
56  
57  
58  
59  
60

## METHODS

## Design and Data Source

To assess funding trends and factors associated with funding success, we assembled a cohort of all applications submitted to the CHR strategic and open operating grant competitions between 2001 and 2011. Application data for operating grants were retrieved from the CHR databases and de-identified. Each application included sex, age of the applicant(s) (in 5 year categories to protect confidentiality), the applicant's role in an operating grant (principal investigator, co-principal investigator, co-investigator), the applicant's institution, the self-reported pillar of the application, whether the application has been submitted previously, whether it was a new application or a renewal, the assigned committee, amount and duration of funding requested, funding outcome, and amount and duration awarded.

To assess factors that were associated with sustained funding, the cohort of principal investigators who were awarded at least one grant between 2001 and 2005 was assembled and followed for 5 years after receiving their first grant. All records of CHR applications and funding decisions were used to create the cohort and measure investigator-related predictors during the follow-up period. A unique encrypted identifier enabled applications from the same individual to be linked through time.

## Funding Success

In the open competition, applications are assigned to one of approximately 50 standing committees. Applications are reviewed and rated by a panel of peers who score the application on a scale from 1 to 4.9. A consensus score is initially reached after the application is presented and discussed. All panel members who are not in conflict of interest, rate the application within  $\pm 0.5$  of the consensus score. The mean score for the application is used to rank applications by score. The top ranked applications within each committee are then funded. Applications with scores below a specific threshold; 3.0 between 2001 and 2003, and 3.5 from 2004 onward, are classified as being of insufficient quality to be fundable, even if funding is available. Funding success was defined as those applications that were funded in the spring and fall open operating grant competitions from 2001 to 2011.

## Potential Predictors of QHR Funding Success

Application characteristics that were measured included the year and season of the application submission (spring or fall), the pillar (biomedical, clinical, health services and policy, population and public health), the age and sex of the nominated principal investigator, the size of the research team (number of investigators listed on a grant application), whether the application was a resubmission of a previously unsuccessful application, and whether it is a new grant or renewal. Critical mass of research capacity within an institution is thought to be an important determinant of research success [7]. To measure critical mass, we measured the number of researchers who submitted applications from the same institution as the principal investigator for the same competition. Critical mass was categorized as <50 colleagues, 50-100, 100-250, 250-350 and >350

1  
2  
3 colleagues in the analysis. For subgroup analysis of the HSPR community, we measured critical  
4  
5 mass of HSPR applications from the same institution for the same competition, classified as <10  
6  
7 colleagues, 10-20, 20-35, 35-50, and > 50 HSPR colleagues.  
8  
9

### 10 11 12 Sustained Funding

13  
14 An applicant was classified as having sustained funding if they had 5 years of continuous,  
15  
16 uninterrupted funding from QHR. To assess sustained funding, all successful applications to  
17  
18 strategic and open competitions as either the principal applicant or as the co-principal applicant  
19  
20 were included. The duration of funding for each grant received was used to assess whether the  
21  
22 applicant had continuous funding in the 5 years following their first successful grant. A principal  
23  
24 investigator who had a gap in QHR funding of greater than one month was classified as having un-  
25  
26 sustained funding. A principal  
27  
28  
29  
30  
31  
32  
33  
34

### 35 36 Potential Predictors of Sustained QHR Funding

37  
38 Two groups of potential predictors of sustained funding were assessed. First we measured the  
39  
40 characteristics of the first successful application including the age and sex of the principal  
41  
42 investigator, the pillar, the size of the research team, the critical mass of investigators at the  
43  
44 applicant's home institution, whether the grant was new or a renewal, whether it was obtained in  
45  
46 the open or in a strategic competition, and grant duration. Second, during the 5 year follow-up  
47  
48 period, we measured whether the principal investigator applied to only open competitions, only  
49  
50 strategic competitions, or both; whether they had a salary award from QHR, whether they  
51  
52  
53  
54  
55  
56  
57  
58  
59  
60



1  
2  
3 switched pillars or universities/ research institutes in subsequent applications, and whether they  
4  
5 resubmitted any unfunded applications during follow-up.  
6  
7  
8  
9

## 10 Analysis

11  
12 Descriptive statistics were used to characterize funding trends between 2001 and 2011, including  
13  
14 the proportions funded, and classified unfundable, the total amount of funding for successful  
15  
16 open and strategic grants per year, and average grant duration requested and awarded. To  
17  
18 estimate predictors of funding success, we used multivariate logistic regression within a  
19  
20 generalized estimating equation framework to account for clustering by principal applicant.  
21  
22 Application was the unit of analysis, funding success was the outcome, application-related  
23  
24 predictors were included as potential predictors, and an exchangeable correlation structure was  
25  
26 used to account for clustering. To estimate predictors of sustained funding, multivariate logistic  
27  
28 regression was used and principal investigator was the unit of analysis. Sustained funding was the  
29  
30 binary outcome and potential predictors were included as covariates. As a previous report of  
31  
32 research funding in Canada suggested that more senior female scientists were less likely to be  
33  
34 funded than males [8], we tested whether success for female scientists was modified by age by  
35  
36 including four dummy variables for gender-age combinations of over and under 45 years of age.  
37  
38  
39  
40  
41  
42  
43  
44  
45  
46 All analyses were conducted in SAS9.3.  
47  
48  
49  
50  
51  
52  
53  
54  
55  
56  
57  
58  
59  
60

## RESULTS

## Funding Trends

Between 2001 and 2011, a total of 80,163 grant applications were submitted to QHR. Over time, there was a three-fold increase in the number of applications; from 4,411 to 12,723 overall, and from 327 to 1,137 for HSPR (Figure 1). The overall funding success rate varied by year between 38.7% and 15.8%, but showed a steady decrease from 2008 onward, commensurate with a substantial and steady increase in the number of applications. The overall funding for grants increased from \$399.2 million in 2001-2 to \$759.7 million in 2011-12 (Figure 2). Although funding of HSPR grants represented only 6.3% of overall funding in 2001-2, it experienced similar increases in funding, from \$12.7 to \$48.0 million, accounting for 3.9% of all funding in 2011-12. Applications from different pillars differed in the duration of funding requested and awarded. On average, biomedical applications requested the longest duration of funding (4.3 years) whereas HSPR applications requested the shortest (2.8 years) (Figure 3).

## Predictors of Funding Success

The age and sex of the applicant modified the likelihood of funding success. Compared to female applicants under the age of 45, males of the same age were significantly more likely to be funded (OR: 1.12; 95% CI: 1.02, 1.24); particularly health services and policy applicants: OR 1.40 (95% CI: 1.01, 1.95) (Table 1). Larger HSPR research teams had an increased likelihood of funding for health services applications but larger teams had the opposite effect—a significant reduction in the likelihood of funding when applications from all pillars were assessed; the only exception being for very large teams of 5 or more investigators. Only 7% of HSPR applications were submitted by a

1  
2  
3 single investigator, compared to 61% of biomedical applications, 10% of clinical, and 10% of  
4  
5 population health applications. The critical mass of active investigators at an applicant's home  
6  
7 institution also increased the likelihood of funding. Applicants whose home institution had 350 or  
8  
9 more active investigators were 67% (OR 1.67; 95% CI: 1.47, 1.89) more likely to be funded, a  
10  
11 linear increase in the probability of funding with increasing number of investigators. The same  
12  
13 trend was evident for HSPR applicants, although once above 10 active investigators, the  
14  
15 probability of funding was similar (OR 1.73, 1.81). There were no significant differences in success  
16  
17 rate by pillar with the exception of clinical research applications that were 21% less likely to be  
18  
19 funded compared to biomedical research applications (OR 0.79; 95% CI: 0.72, 0.87). The  
20  
21 resubmission of a previously unsuccessful application significantly increased the likelihood of  
22  
23 success, as did submission in the spring competition. Compared to 2001, there was a significant  
24  
25 reduction in the likelihood of funding after 2004, a 16% reduction in 2005 (OR 0.84; 95% CI: 0.74,  
26  
27 0.94), increasing to a 51% reduction in the probability of funding in 2011 (OR 0.49; 95% CI: 0.42,  
28  
29 0.57). We could not include new versus renewal status in the models, as almost all renewal  
30  
31 applications were from the biomedical community (88% in the first 10 years), and the models did  
32  
33 not converge.  
34  
35  
36  
37  
38  
39  
40  
41  
42  
43  
44

#### 45 Predictors of Sustained Funding

46  
47 Between 2001 and 2005, 4,725 principal investigators had at least one successful grant application  
48  
49 (Table 2). Within this cohort, 334 (7.1%) classified their first successful grant as HSPR, and 444  
50  
51 (9.4%) applied for a health services research grant in the next 5 years, all of whom were included  
52  
53 in the subgroup analysis. Older male investigators were 45% more likely to have sustained funding  
54  
55  
56  
57  
58  
59  
60

1  
2  
3  
4  
5  
6  
7  
8  
9  
10  
11  
12  
13  
14  
15  
16  
17  
18  
19  
20  
21  
22  
23  
24  
25  
26  
27  
28  
29  
30  
31  
32  
33  
34  
35  
36  
37  
38  
39  
40  
41  
42  
43  
44  
45  
46  
47  
48  
49  
50  
51  
52  
53  
54  
55  
56  
57  
58  
59  
60

compared to females under 45 years of age (OR 1.45; 95%CI: 1.13, 1.84), an equivalent 36% increase in the odds of sustained funding in the health services subgroup was observed, but it was not statistically significant (OR 1.36; 95%CI: 0.62, 3.00). Of interest, older female HSPR applicants were significantly less likely to have sustained funding than younger females (OR 0.42; 95%CI: 0.18, 1.00). Clinical, health services, and population health investigators were all significantly less likely to have sustained funding compared to biomedical investigators. Only 24.0% of health services applicants had sustained funding compared to 52.8% of biomedical applicants; a 66% reduction on the odds of sustained funding (OR 0.34; 95%CI: 0.24, 0.49). Investigators were also less likely to be funded if their home institutions had a lower critical mass. Particularly for the subgroup of health services investigators with a 4-fold difference in sustained funding in institutions with 50 HSPR applicants compared to less than 10 applicants (OR 3.88; 95%CI: 1.21, 12.5). Overall, a longer duration of funding awarded in the first successful grant increased the likelihood of continuous funding by 7% for each additional month requested (OR 1.07; 95%CI: 1.06, 1.08), and by 8% in HSPR (OR 1.08; 95%CI: 1.06, 1.10).

During follow-up, applicants who applied to both strategic and open competitions were more likely to be sustained compared to those who only applied to the open (OR 0.75; 95%CI: 0.62, 0.90) or strategic (OR 0.56; 95%CI: 0.41, 0.75) competitions. While similar trends existed for health services investigators, they were not statistically significant. There was a two-fold increase in sustained funding among investigators with a QHR salary award (OR 2.21; 95%CI: 1.81, 2.69), but not for HSPR researchers. Resubmitting an unsuccessful application during follow-up significantly increased the odds of sustained funding for health services researchers (OR 3.79;

1  
2  
3 95% CI: 1.99, 7.22), but not for other investigators. Having research programs that encompassed  
4  
5 more than one pillar increased the likelihood of sustained funding, particularly for health services  
6  
7 investigators (OR 2.20; 95% CI: 1.18, 4.11), whereas switching universities increased the odds of  
8  
9 sustained funding by 43%, but only for all applicants (OR 1.43; 95% CI: 1.18, 1.74).  
10  
11  
12  
13  
14  
15  
16  
17

## 18 INTERPRETATION

19  
20 Between 2001 and 2011, there was a substantial increase in the number of applications submitted  
21  
22 to CIHR, including applications for HSPR. The three-fold increase in the number of applications  
23  
24 may be related to substantial investment in health research infrastructure by the Canada  
25  
26 Foundation for Innovation (\$1.5 billion) [9], and in world class talent through the Canada Research  
27  
28 Chairs program (\$4.2 billion) [10]. In addition, CIHR and CHSRF jointly funded regional training  
29  
30 centers for almost a decade to boost capacity in health services research. Combined, these  
31  
32 programs likely boosted the number and quality of applications to CIHR. While the overall budget  
33  
34 for CIHR in the first decade was \$8.7 billion, the number of applications outstripped the capacity  
35  
36 to fund excellent projects as funding rates in the open competition dropped from 27.6% in 2001 to  
37  
38 18.3% in 2011, while the proportion of fundable research increased. In Canada, the ratio of federal  
39  
40 investment in infrastructure and people, relative to operational dollars to support these  
41  
42 researchers, was 1.5. To guide science policy, future research should assess whether a higher ratio  
43  
44 of operating funds might be needed to maximize the return on investment in health research.  
45  
46  
47  
48  
49  
50  
51  
52  
53  
54  
55  
56  
57  
58  
59  
60

1  
2  
3 Similar factors predicted funding success of HSPR researchers and all CHR applicants. Young male  
4  
5 scientists were more likely to receive operating grant funding as were applicants who were  
6  
7 housed in institutions with a greater critical mass, and with a willingness to re-submit unsuccessful  
8  
9 grants applications. Others have noted similar differences in research funding between males and  
10  
11 female scientists [11,12]. The most comprehensive analysis of this phenomenon was conducted  
12  
13 with data from the Swedish Medical Research Council [11]. The investigators found that female  
14  
15 scientists had to have 2.5 times as many impactful publications as male scientists to receive an  
16  
17 equivalent score by peer reviewers for scientific competence; a phenomenon they attributed to  
18  
19 reviewer bias. The European Molecular Biology Organization reported the same phenomenon in  
20  
21 an analysis of success rates for male and female postdoctoral fellows [12], as did a subsequent  
22  
23 team of Swedish researchers using more recent data [13].  
24  
25  
26  
27  
28  
29  
30  
31  
32

33 Of interest, both the original and subsequent Swedish studies identified a “friendship bonus” or  
34  
35 cronyism bias [11,13]. Having a colleague who was in conflict with the applicant on the review  
36  
37 panel increased the likelihood of funding. Even though the colleague did not rate the application,  
38  
39 they appear to have influenced the committee. Institutions with greater critical mass may have  
40  
41 more reviewers on the panel who are in conflict, increasing the odds that applicants from these  
42  
43 institutions will be funded. However, a larger critical mass is known to confer other benefits  
44  
45 including research infrastructure, greater opportunities for collaboration [14,15], and professional  
46  
47 support services that would help scientists in the institution develop and submit more polished  
48  
49 proposals [16]. The team size was one differentiating predictor of success with health services  
50  
51  
52  
53  
54  
55  
56  
57  
58  
59  
60

1  
2  
3 research that was not true of the general research community. This may reflect the requirement  
4  
5 for multiple disciplines and collaborators to be involved in HSPR to produce high quality science.  
6  
7  
8  
9

10 Health services researchers had a comparatively disappointing performance in obtaining sustained  
11  
12 funding. As the average duration of funding requested by health services researchers was the  
13  
14 shortest, and as most successful grants needed to be re-submitted to be funded, health services  
15  
16 and policy researchers may be in a high revolution grant treadmill. To maintain continuous  
17  
18 funding, the average HSPR researcher who requests a 2.5 year duration project would have to  
19  
20 submit or resubmit many more applications. It is possible that HSPR scientists draw from a more  
21  
22 diversified pool of funders and thus can sustain their research teams through other sources of  
23  
24 funding. However, the culture of HSPR, stemming from the early days of NHRDP, was project by  
25  
26 project-based funding. There was no support for multi-year programs of research that may be  
27  
28 needed to address important gaps and relevant priorities. This may be why Canadian health  
29  
30 services researchers, at least in one report, had the lowest rates of scientific productivity, as  
31  
32 greater effort has to be made to sustain their research funding, robbing from time needed to  
33  
34 publish [17].  
35  
36  
37  
38  
39  
40  
41  
42  
43  
44

45 QHR has successfully increased the amount of funded health research in Canada, including HSPR  
46  
47 However, this sector of science still accounts for the smallest proportion of funding. If there is to  
48  
49 be true innovation in health system reform to meet the challenges of the increasing burden of  
50  
51 chronic disease and multi-morbidity, then greater investment in HSPR will be needed. Knowledge  
52  
53 intensive industries invest at least 5% in research and development to sustain active innovation  
54  
55  
56  
57  
58  
59  
60

1  
2  
3 [18]. With an annual expenditure of \$215 billion in health care in Canada in 2014 [19], \$10.75  
4  
5 billion should be invested in HSPR to meet the goals of health system adaptation and  
6  
7 transformation. As health care costs amount to approximately 50% of provincial budgets, and 11%  
8  
9 of the gross domestic product [19], there is an urgent need to act to address the research and  
10  
11 development funding needed for system reform. The new Strategy for Patient-Oriented Research  
12  
13 (SPOR) [20] is one initiative that will boost provincial and academic capacity to provide timely,  
14  
15 responsive and relevant research for system transformation. The new Canadian Alliance for Health  
16  
17 Services and Policy Research [21] provides another avenue for collaboration on a common vision  
18  
19 and strategy for funding research and the next generation of health services and policy  
20  
21 researchers that can engage in a learning health system.  
22  
23  
24  
25  
26  
27  
28  
29  
30

31 There are important limitations that need to be considered. Information was only available for  
32  
33 QHR applications, not all potential sources of support. While this limitation will not influence  
34  
35 factors associated with QHR funding success, it may bias the estimated prevalence of sustained  
36  
37 funding and the factors associated with it. Moreover, scientific productivity was not measured, nor  
38  
39 peer review reliability and validity. These are important areas for future research to understand  
40  
41 gender differences in funding success rates and establish appropriate policy to enable optimal  
42  
43 peer review.  
44  
45  
46  
47  
48  
49  
50  
51  
52  
53  
54  
55  
56  
57  
58  
59  
60



1  
2  
3 Contributors: All authors contributed to study concept and design. Robyn Tamblyn, Nadyne  
4  
5 Girard, and Kim Gaudreau contributed to the analysis and interpretation of the data. The  
6  
7 manuscript was drafted by Robyn Tamblyn, Meghan McMahon, Elizabeth Drake, and Jessica  
8  
9 Nadigel. All of the authors critically revised the manuscript for important intellectual content and  
10  
11 approved the final version submitted for publication.  
12  
13  
14  
15  
16  
17

18 Funding: This study was supported by the Canadian Institutes of Health Research  
19  
20  
21  
22  
23  
24  
25  
26  
27  
28  
29  
30  
31  
32  
33  
34  
35  
36  
37  
38  
39  
40  
41  
42  
43  
44  
45  
46  
47  
48  
49  
50  
51  
52  
53  
54  
55  
56  
57  
58  
59  
60

Confidential

## Reference List

1. O'Brien-Pallas L, Meyer RM (2008) A century of research in nursing human resources. *Canadian Nurse* 104: 29-30.
2. World Health Organization. Facing the facts: The impact of chronic disease in Canada 2005. World Health Organization. [http://www.who.int/chp/chronic\\_disease\\_report/media/CANADA.pdf](http://www.who.int/chp/chronic_disease_report/media/CANADA.pdf). Accessed on 23/2/2015.
3. Public Health Agency of Canada. Toward a Healthy Future: Second Report on the Health of Canadians and Strategies for Population Health: Investing in the Health of Canadians. 2013 Jan 15.
4. Weingarten SR, Henning JM, Badamgarav E, Knight K, Hasselblad V, Cano A, Jr., Ofman JJ (2002) Interventions used in disease management programmes for patients with chronic illness-which ones work? Meta-analysis of published reports. *Br Med J* 325: 925.
5. Canadian Institutes of Health Research. Canadian Institutes of Health Research. 4-1-2014. Ottawa ON, CIHR <http://www.cihr-irsc.gc.ca/e/9466.html#a>. Accessed on 23/2/2015.
6. Canadian Institutes of Health Research. National Consultation Summary Report. CIHR, editor. 8-14-2009. Ottawa ON, CIHR <http://www.cihr-irsc.gc.ca/e/39976.html>. Accessed on 23/2/2015.
7. Association of Research Centres in the Social Sciences (ARCIS). Response to the HEFCE Review of Research. 2000. [www.arciss.ac.uk/downloads/hefce.doc](http://www.arciss.ac.uk/downloads/hefce.doc). Accessed on 23/2/2015.
8. Expert Panel on Women in University Research (2012) Strengthening Canada's research capacity: the gender dimension.
9. Canadian Foundation for Innovation (2012) Understanding the role of CFI-funded infrastructure in intersectoral linkages.
10. Michelle Picard-Aitken, Trina Foster, Isabelle Labrosse, Julie Caruso, David Campbell, Eric Archambault (2010) Tenth-Year Evaluation of the Canada Research Chairs Program: Final Evaluation Report.
11. Wenneras C, Wold A (1997) Nepotism and sexism in peer-review. *Nature* 387: 341-343.
12. Gannon F, Quirk S, Guest S (2001) Searching for discrimination: Are women treated fairly in the EMBO postdoctoral fellowship scheme? *EMBO Reports* 2: 655-657.

- 1  
2  
3 13. Sandstrom U, Hallsten M (2008) Persistent nepotism in peer-review. *Scientometrics* 74:  
4 175-189.  
5
- 6  
7 14. Marsh HW, Jayasinghe UW, Bond N (2008) Improving the Peer-Review Process for Grant  
8 Applications: Reliability, Validity, Bias, and Generalizability. *American*  
9 *Psychologist* 63: 160-168.
- 10  
11 15. Paul Jump. REF 2014 results: table of excellence. 2015. The Higher Education.  
12 <http://www.timeshighereducation.co.uk/story.aspx?storyCode=2017590>. Accessed  
13 on 23/2/2015.  
14
- 15  
16 16. Holly Else. REF results reopen funding debate. 2015. The Higher Education.  
17 [http://www.timeshighereducation.co.uk/news/ref-results-reopen-funding-](http://www.timeshighereducation.co.uk/news/ref-results-reopen-funding-debate/2017616.article)  
18 [debate/2017616.article](http://www.timeshighereducation.co.uk/news/ref-results-reopen-funding-debate/2017616.article). Accessed on 23/2/2015..  
19
- 20  
21 17. Peckham M (1991) Research and development for the National Health Service. *Lancet*  
22 338: 367-371. 0140-6736(91)90494-A [pii].  
23
- 24  
25 18. National Science Foundation, National Center for Science and Engineering Statistics  
26 (2010) Industry, Technology, and the Global Marketplace. In: National Board of  
27 Science, editors. *Science and Engineering Indicators: 2010*. Arlington. pp. 6-4-6-  
28 61.  
29
- 30  
31 19. Canadian Institute for Health Information. Spending. 2015. Canadian Institute for Health  
32 Information. [http://www.cihi.ca/QHI-ext-](http://www.cihi.ca/QHI-ext-portal/internet/EN/SubTheme/spending+and+health+workforce/spending/cihi015954)  
33 [portal/internet/EN/SubTheme/spending+and+health+workforce/spending/cihi01595](http://www.cihi.ca/QHI-ext-portal/internet/EN/SubTheme/spending+and+health+workforce/spending/cihi015954)  
34 [4](http://www.cihi.ca/QHI-ext-portal/internet/EN/SubTheme/spending+and+health+workforce/spending/cihi015954). Accessed 23//2/201.  
35
- 36  
37 20. Canadian Institute of Health Research (2011) Canada's Strategy for Patient-Oriented  
38 Research - Improving health outcomes through evidence-informed care.
- 39  
40 21. CIHR Institute of Health Services and Policy Research in collaboration with Terrence  
41 Sullivan & Associates (2015) Pan-Canadian Vision and Strategy for Health Services  
42 and Policy Research: 2014-2019.  
43  
44  
45  
46  
47  
48  
49  
50  
51  
52  
53  
54  
55  
56  
57  
58  
59  
60

Table 1: The Association between Application Characteristics and Funding Success for 33 155 New Applications submitted to the Open Operating Grant Competition between 2001 and 2011.

| Application Characteristics              | All Applications (N=33155) |          |            |             |         | Health Services and Policy Applications (N=2498) |          |            |             |         |
|------------------------------------------|----------------------------|----------|------------|-------------|---------|--------------------------------------------------|----------|------------|-------------|---------|
|                                          | Number Applications        | % Funded | Odds Ratio | 95% C.I.    | P-Value | Number Applications                              | % Funded | Odds Ratio | 95% C.I.    | P-Value |
| <b>Age and Sex (PI)</b>                  |                            |          |            |             |         |                                                  |          |            |             |         |
| Female, under 45                         | 4379                       | 21.4     | Ref        |             |         | 487                                              | 19.1     | Ref        |             |         |
| Female, over 45                          | 4379                       | 19.9     | 0.91       | (0.8-1.01)  | 0.08    | 603                                              | 19.2     | 0.99       | (0.72-1.36) | 0.94    |
| Male, under 45                           | 8757                       | 23.2     | 1.12       | (1.02-1.24) | 0.02    | 489                                              | 24.5     | 1.40       | (1.01-1.95) | 0.04    |
| Male, over 45                            | 12199                      | 21.3     | 1.00       | (0.91-1.10) | 0.97    | 645                                              | 21.4     | 1.10       | (0.79-1.52) | 0.57    |
| Missing Age or Sex                       | 3441                       | 18.3     | 0.80       | (0.71-0.91) | <0.005  | 274                                              | 19.0     | 1.02       | (0.70-1.49) | 0.91    |
| <b>Institutional Critical Mass (HSR)</b> |                            |          |            |             |         |                                                  |          |            |             |         |
| <50 applicants (<10)                     | 2500                       | 16.0     | Ref        |             |         | 352                                              | 11.9     | Ref        |             |         |
| 50-100 (10-20)                           | 1330                       | 19.5     | 1.15       | (0.95-1.40) | 0.15    | 110                                              | 20.9     | 1.73       | (0.96-3.13) | 0.07    |
| 100-250 (20-35)                          | 3662                       | 19.2     | 1.27       | (1.09-1.47) | <0.005  | 516                                              | 21.7     | 1.74       | (1.18-2.57) | 0.005   |
| 250-350 (35-50)                          | 9458                       | 21.2     | 1.45       | (1.27-1.65) | <0.0001 | 335                                              | 22.4     | 1.83       | (1.21-2.76) | <0.005  |
| 350+ applicants (50+)                    | 16205                      | 22.9     | 1.67       | (1.47-1.89) | <0.0001 | 1185                                             | 23.7     | 1.81       | (1.28-2.57) | <0.005  |
| <b>Number of Co-Investigators</b>        |                            |          |            |             |         |                                                  |          |            |             |         |
| 1 co-investigator                        | 14247                      | 23.4     | Ref        |             |         | 179                                              | 13.4     | Ref        |             |         |
| 2 co-investigators                       | 5274                       | 16.8     | 0.71       | (0.65-0.77) | <0.0001 | 186                                              | 15.1     | 1.19       | (0.68-2.11) | 0.54    |
| 3 co-investigators                       | 3892                       | 19.4     | 0.86       | (0.78-0.95) | <0.005  | 298                                              | 14.8     | 1.15       | (0.68-1.97) | 0.60    |
| 4 co-investigators                       | 2838                       | 19.8     | 0.93       | (0.83-1.04) | 0.19    | 351                                              | 17.1     | 1.28       | (0.76-2.15) | 0.35    |
| ≥5 co-investigators                      | 6904                       | 22.2     | 1.11       | (1.01-1.22) | 0.03    | 1484                                             | 24.5     | 2.08       | (1.33-3.26) | <0.005  |
| <b>Pillar</b>                            |                            |          |            |             |         |                                                  |          |            |             |         |
| Biomedical                               | 21321                      | 21.6     | Ref        |             |         | NA                                               |          |            |             |         |
| Clinical                                 | 5394                       | 18.7     | 0.79       | (0.72-0.87) | <0.0001 |                                                  |          |            |             |         |
| Health Services/Policy                   | 2498                       | 20.8     | 0.91       | (0.80-1.03) | 0.13    |                                                  |          |            |             |         |
| Pop and Public Health                    | 3588                       | 20.3     | 0.95       | (0.85-1.06) | 0.35    |                                                  |          |            |             |         |
| Missing                                  | 354                        | 63.0     | 8.12       | (6.22-10.7) | <0.0001 |                                                  |          |            |             |         |
| <b>Resubmission</b>                      |                            |          |            |             |         |                                                  |          |            |             |         |
| No                                       | 17708                      | 17.2     | Ref        |             |         | 1554                                             | 16.9     | Ref        |             |         |
| Yes                                      | 15447                      | 26.1     | 1.92       | (1.82-2.03) | <0.0001 | 944                                              | 27.1     | 1.83       | (1.51-2.23) | <0.0001 |
| <b>Season</b>                            |                            |          |            |             |         |                                                  |          |            |             |         |
| Fall                                     | 16429                      | 20.5     | Ref        |             |         | 1262                                             | 19.7     | Ref        |             |         |
| Spring                                   | 16726                      | 22.1     | 1.11       | (1.06-1.17) | <0.0001 | 1236                                             | 21.8     | 1.14       | (0.93-1.39) | 0.20    |
| <b>Year</b>                              |                            |          |            |             |         |                                                  |          |            |             |         |
| 2001                                     | 2416                       | 27.6     | Ref        |             |         | 225                                              | 20.9     | Ref.       |             |         |
| 2002                                     | 2623                       | 25.6     | 0.95       | (0.84-1.07) | 0.40    | 221                                              | 21.7     | 0.94       | (0.60-1.46) | 0.77    |
| 2003                                     | 2581                       | 24.9     | 0.97       | (0.85-1.09) | 0.58    | 216                                              | 25.5     | 1.00       | (0.64-1.57) | 0.99    |
| 2004                                     | 2597                       | 24.3     | 0.94       | (0.83-1.07) | 0.33    | 198                                              | 26.3     | 1.16       | (0.73-1.86) | 0.52    |
| 2005                                     | 3134                       | 22.3     | 0.84       | (0.74-0.94) | <0.005  | 226                                              | 23.0     | 0.95       | (0.61-1.47) | 0.81    |
| 2006                                     | 3294                       | 18.2     | 0.63       | (0.56-0.72) | <0.0001 | 213                                              | 16.0     | 0.58       | (0.34-0.99) | 0.05    |

For Peer Review Only

|      |      |      |      |             |         |     |      |      |             |      |
|------|------|------|------|-------------|---------|-----|------|------|-------------|------|
| 2007 | 3309 | 24.5 | 0.87 | (0.77-0.98) | 0.02    | 252 | 25.8 | 1.06 | (0.70-1.62) | 0.77 |
| 2008 | 3315 | 20.9 | 0.71 | (0.63-0.80) | <0.0001 | 235 | 20.4 | 0.73 | (0.46-1.17) | 0.19 |
| 2009 | 3622 | 17.5 | 0.57 | (0.51-0.65) | <0.0001 | 227 | 15.4 | 0.55 | (0.34-0.92) | 0.02 |
| 2010 | 4151 | 16.4 | 0.51 | (0.45-0.58) | <0.0001 | 330 | 17.6 | 0.68 | (0.43-1.08) | 0.10 |
| 2011 | 4654 | 18.3 | 0.49 | (0.42-0.57) | <0.0001 | 320 | 19.4 | 0.55 | (0.31-0.95) | 0.03 |

Confidential

For Peer Review Only

1  
2  
3  
4  
5  
6  
7  
8  
9  
10  
11  
12  
13  
14  
15  
16  
17  
18  
19  
20  
21  
22  
23  
24  
25  
26  
27  
28  
29  
30  
31  
32  
33  
34  
35  
36  
37  
38  
39  
40  
41  
42  
43  
44  
45  
46  
47  
48  
49

Table 2: The Association between Application Characteristics and Odds of Sustained Funding among the 4,725 Principal Investigators who Received Funding for a Grant Application between 2001 and 2005.

| Applicant Characteristics                        | All Applications (N=4,725) |             |            |             |         | Health Services and Policy Applications (N=444) |             |            |             |         |
|--------------------------------------------------|----------------------------|-------------|------------|-------------|---------|-------------------------------------------------|-------------|------------|-------------|---------|
|                                                  | Number Applications        | % Sustained | Odds Ratio | 95% C.I.    | P-Value | Number Applications                             | % Sustained | Odds Ratio | 95% C.I.    | P-Value |
| <b>Age and Sex (PI)</b>                          |                            |             |            |             |         |                                                 |             |            |             |         |
| Female, under 45                                 | 633                        | 32.9        | Ref.       |             |         | 80                                              | 31.3        | Ref.       |             |         |
| Female, over 45                                  | 578                        | 36.2        | 1.21       | (0.90-1.63) | 0.20    | 104                                             | 19.2        | 0.42       | (0.18-1.01) | 0.05    |
| Male, under 45                                   | 1346                       | 43.7        | 1.18       | (0.93-1.50) | 0.17    | 88                                              | 22.7        | 0.65       | (0.28-1.54) | 0.33    |
| Male, over 45                                    | 1611                       | 48.0        | 1.45       | (1.13-1.84) | 0.003   | 129                                             | 35.7        | 1.36       | (0.62-3.00) | 0.45    |
| Missing Age or Sex                               | 557                        | 31.8        | 1.00       | (0.74-1.35) | 0.98    | 43                                              | 25.6        | 0.52       | (0.18-1.48) | 0.22    |
| <b>Characteristics of the First Funded Grant</b> |                            |             |            |             |         |                                                 |             |            |             |         |
| <b>Institutional Critical Mass</b>               |                            |             |            |             |         |                                                 |             |            |             |         |
| <50 applicants (<10)                             | 512                        | 21.1        | Ref.       |             |         | 48                                              | 10.4        | Ref.       |             |         |
| 50-100 (10-20)                                   | 178                        | 21.9        | 1.32       | (0.79-2.20) | 0.29    | 64                                              | 23.4        | 2.28       | (0.62-8.35) | 0.21    |
| 100-250 (20-35)                                  | 1000                       | 43.1        | 1.85       | (1.37-2.51) | <0.0001 | 91                                              | 26.4        | 2.79       | (0.83-9.35) | 0.09    |
| 250-350 (35-50)                                  | 902                        | 45.1        | 2.04       | (1.50-2.79) | <0.0001 | 105                                             | 35.2        | 3.83       | (1.19-12.4) | 0.02    |
| 350+ applicants (50+)                            | 2133                       | 45.5        | 2.03       | (1.52-2.70) | <0.0001 | 136                                             | 30.1        | 3.88       | (1.21-12.5) | 0.02    |
| <b>Number of Co-Investigators</b>                |                            |             |            |             |         |                                                 |             |            |             |         |
| 1 co-investigator                                | 2544                       | 46.7        | Ref.       |             |         | 34                                              | 29.4        | Ref.       |             |         |
| 2 co-investigators                               | 558                        | 37.8        | 0.76       | (0.61-0.96) | 0.02    | 28                                              | 25.0        | 1.36       | (0.28-6.73) | 0.70    |
| 3 co-investigators                               | 432                        | 29.9        | 0.67       | (0.50-0.88) | 0.004   | 51                                              | 11.8        | 0.59       | (0.12-2.87) | 0.51    |
| 4 co-investigators                               | 309                        | 33.0        | 0.84       | (0.61-1.16) | 0.28    | 59                                              | 23.7        | 1.08       | (0.26-4.51) | 0.91    |
| ≥5 co-investigators                              | 882                        | 36.8        | 1.06       | (0.82-1.36) | 0.66    | 272                                             | 31.3        | 1.22       | (0.33-4.47) | 0.76    |
| <b>Pillar</b>                                    |                            |             |            |             |         |                                                 |             |            |             |         |
| Biomedical                                       | 2698                       | 52.8        | Ref.       |             |         | NA                                              |             |            |             |         |
| Clinical                                         | 484                        | 36.4        | 0.47       | (0.36-0.62) | <0.0001 |                                                 |             |            |             |         |
| Health Services/ Policy                          | 334                        | 24.0        | 0.34       | (0.24-0.49) | <0.0001 |                                                 |             |            |             |         |
| Pop and Public Health                            | 523                        | 26.6        | 0.52       | (0.39-0.71) | <0.0001 |                                                 |             |            |             |         |
| Missing                                          | 686                        | 20.0        | 0.77       | (0.58-1.02) | 0.06    |                                                 |             |            |             |         |
| <b>Funding Source</b>                            |                            |             |            |             |         |                                                 |             |            |             |         |
| Open Competition                                 | 2934                       | 51.5        | Ref.       |             |         | 210                                             | 32.4        | Ref.       |             |         |
| Strategic Competition                            | 1791                       | 24.8        | 1.11       | (0.92-1.34) | 0.27    | 234                                             | 23.1        | 1.36       | (0.76-2.44) | 0.30    |
| <b>Grant Type</b>                                |                            |             |            |             |         |                                                 |             |            |             |         |
| New Grant                                        | 3615                       | 33.7        | Ref.       |             |         | 430                                             | 26.5        | Ref.       |             |         |
| Renewal                                          | 1110                       | 66.6        | 3.01       | (2.48-3.66) | <0.0001 | 14                                              | 57.1        | 2.32       | (0.39-13.9) | 0.36    |
| <b>Duration of Grant (per month)</b>             |                            |             |            |             |         |                                                 |             |            |             |         |
|                                                  | 4725                       | 41.8 (19.8) | 1.07       | (1.06-1.08) | <0.0001 | 444                                             | 37.7 (19.7) | 1.08       | (1.06-1.10) | <0.0001 |

Applicant and Application Characteristics During Follow-up

|    |                                      |      |      |      |             |         |     |      |      |                     |
|----|--------------------------------------|------|------|------|-------------|---------|-----|------|------|---------------------|
| 1  | Funds Applied for: Follow-up         |      |      |      |             |         |     |      |      |                     |
| 2  | Both Open & Strategic                | 2644 | 48.9 | Ref. |             |         | 289 | 36.3 | Ref. |                     |
| 3  | Open only                            | 893  | 42.9 | 0.75 | (0.62-0.90) | 0.002   | 38  | 26.3 | 0.70 | (0.34-2.04) 0.52    |
| 4  | Strategic Only                       | 506  | 27.1 | 0.56 | (0.41-0.75) | <0.0001 | 71  | 7.0  | 0.39 | (0.13-1.19) 0.10    |
| 5  |                                      |      |      |      |             |         |     |      |      |                     |
| 6  | Had a QHR Salary Award               |      |      |      |             |         |     |      |      |                     |
| 7  | No                                   | 3949 | 38.0 | Ref. |             |         | 381 | 25.7 | Ref. |                     |
| 8  | Yes                                  | 776  | 58.9 | 2.21 | (1.81-2.69) | <0.0001 | 63  | 38.1 | 1.3  | (0.64-2.66) 0.47    |
| 9  |                                      |      |      |      |             |         |     |      |      |                     |
| 10 | Resubmission during follow-up        |      |      |      |             |         |     |      |      |                     |
| 11 | No                                   | 2269 | 40.3 | Ref. |             |         | 207 | 14.5 | Ref. |                     |
| 12 | Yes                                  | 2456 | 42.4 | 1.10 | (0.94-1.29) | 0.22    | 237 | 38.8 | 3.79 | (1.99-7.22) <0.0001 |
| 13 |                                      |      |      |      |             |         |     |      |      |                     |
| 14 | Applications to Multiple Pillars     |      |      |      |             |         |     |      |      |                     |
| 15 | No                                   | 3583 | 41.4 | Ref. |             |         | 177 | 16.4 | Ref. |                     |
| 16 | Yes                                  | 1142 | 41.4 | 1.63 | (1.34-1.98) | <0.0001 | 267 | 34.8 | 2.20 | (1.18-4.11) 0.01    |
| 17 |                                      |      |      |      |             |         |     |      |      |                     |
| 18 | Switched Universities                |      |      |      |             |         |     |      |      |                     |
| 19 | No                                   | 3735 | 40.9 | Ref. |             |         | 281 | 25.6 | Ref. |                     |
| 20 | Yes                                  | 990  | 43.1 | 1.43 | (1.18-1.74) | 0.0002  | 163 | 30.7 | 1.11 | (0.63-1.98) 0.71    |
| 21 |                                      |      |      |      |             |         |     |      |      |                     |
| 22 | *model adjusted for amount requested |      |      |      |             |         |     |      |      |                     |

For Peer Review Only

1  
2  
3  
4  
5  
6  
7  
8  
9  
10  
11  
12  
13  
14  
15  
16  
17  
18  
19  
20  
21  
22  
23  
24  
25  
26  
27  
28  
29  
30  
31  
32  
33  
34  
35  
36  
37  
38  
39  
40  
41  
42  
43  
44  
45  
46  
47  
48  
49

Figure 1 Number of Open and Strategic Grant Applications by Year, Pillar and Funding Status (2001-2011)

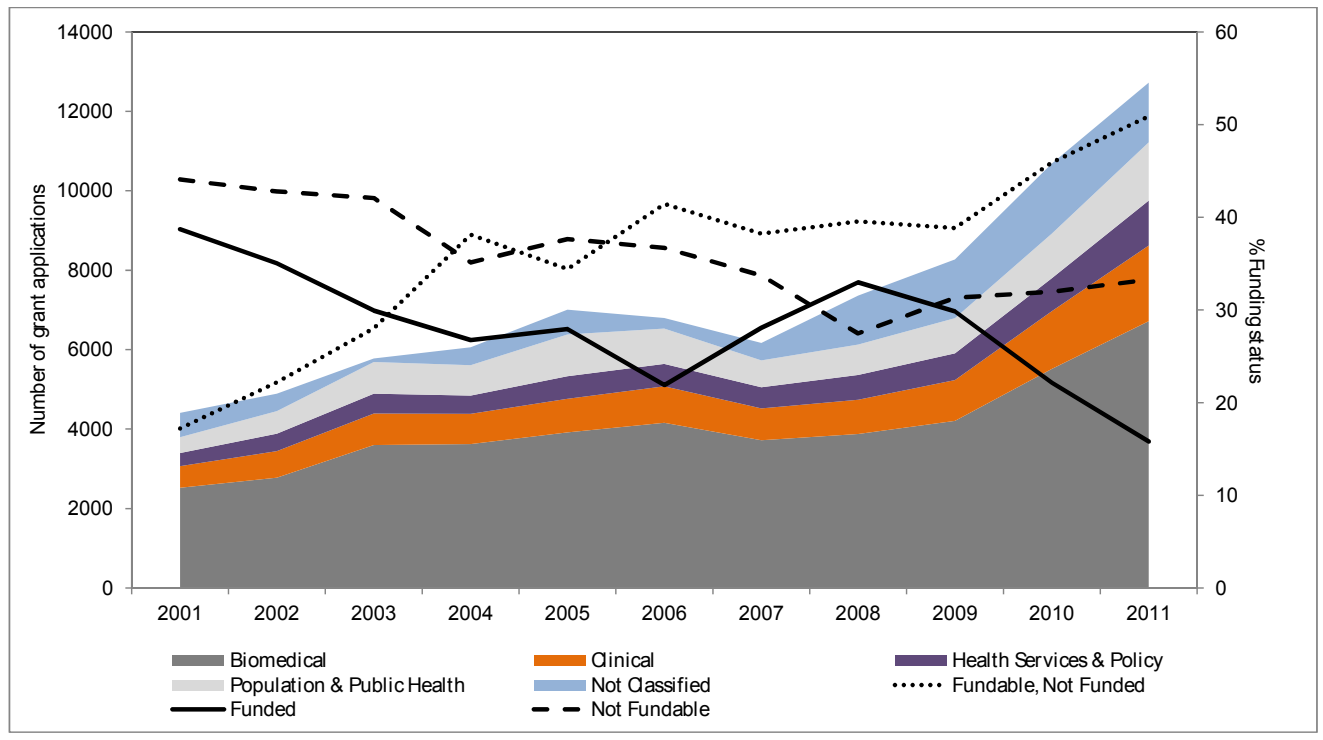

For Peer Review Only



Figure 2 Total Funding Awarded to Open and Strategic Grant Applications by Fiscal Year and Pillar (2001-2011)<sup>1</sup>

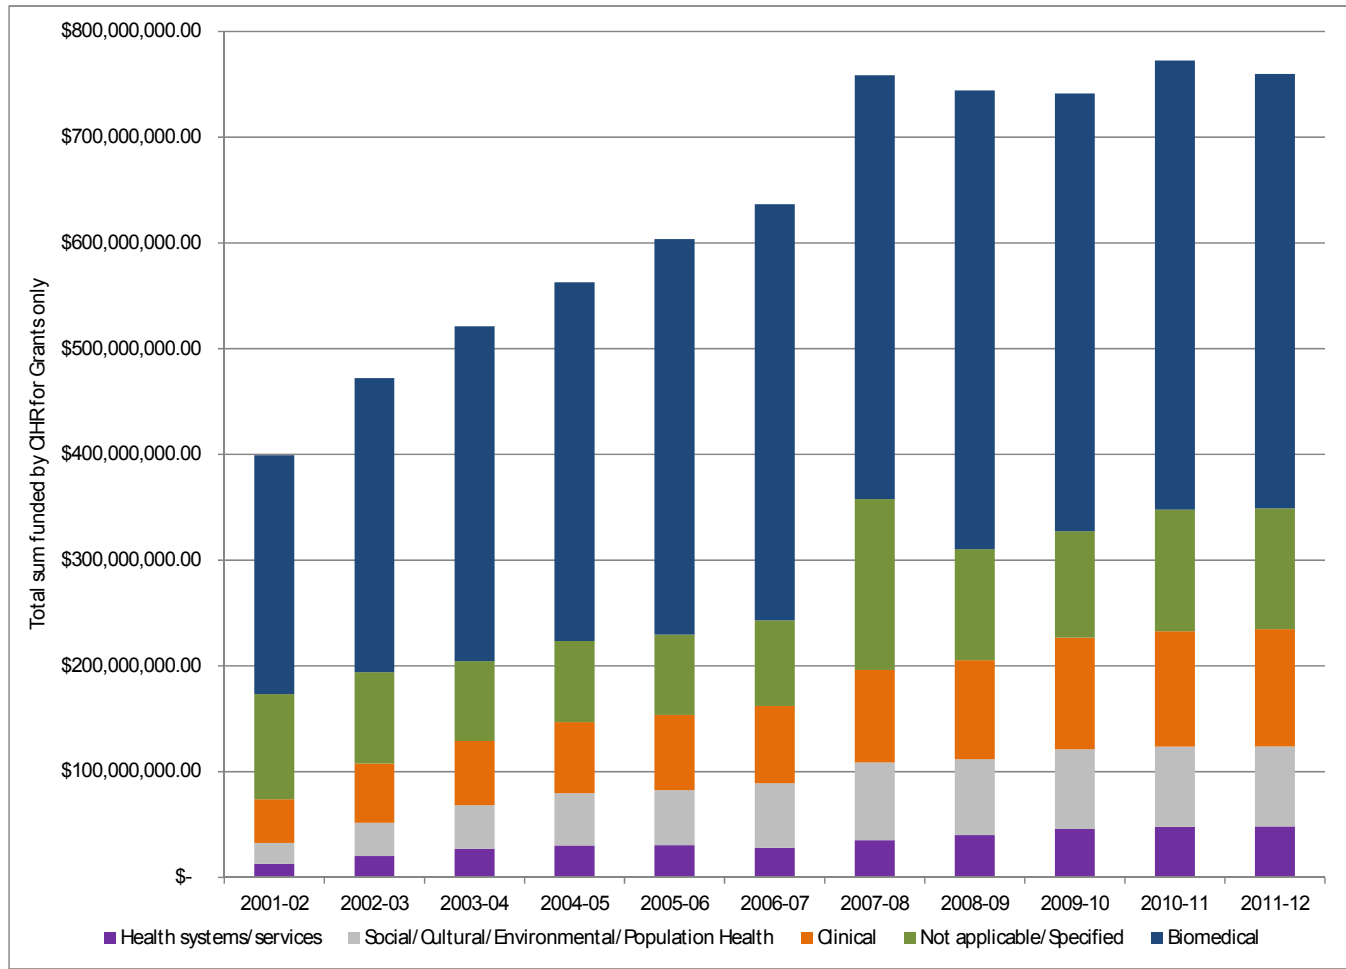

<sup>1</sup> The amount in each fiscal year represents the first year expenditure for new grants awarded as well as subsequent years of funding for grants awarded in previous years. As data were only available for new grants starting in the 2001-02 fiscal year (not amounts awarded through the prior awards at MRC and NHRDP), the sum is artificially lower in the 2001-02 and 2002-03 fiscal years

For Peer Review Only

1  
2  
3  
4  
5  
6  
7  
8  
9  
10  
11  
12  
13  
14  
15  
16  
17  
18  
19  
20  
21  
22  
23  
24  
25  
26  
27  
28  
29  
30  
31  
32  
33  
34  
35  
36  
37  
38  
39  
40  
41  
42  
43  
44  
45  
46  
47  
48  
49

Figure 3 Duration of Grant Funding Requested and Awarded for Open and Strategic Operating Grant Applications (2001-2011)

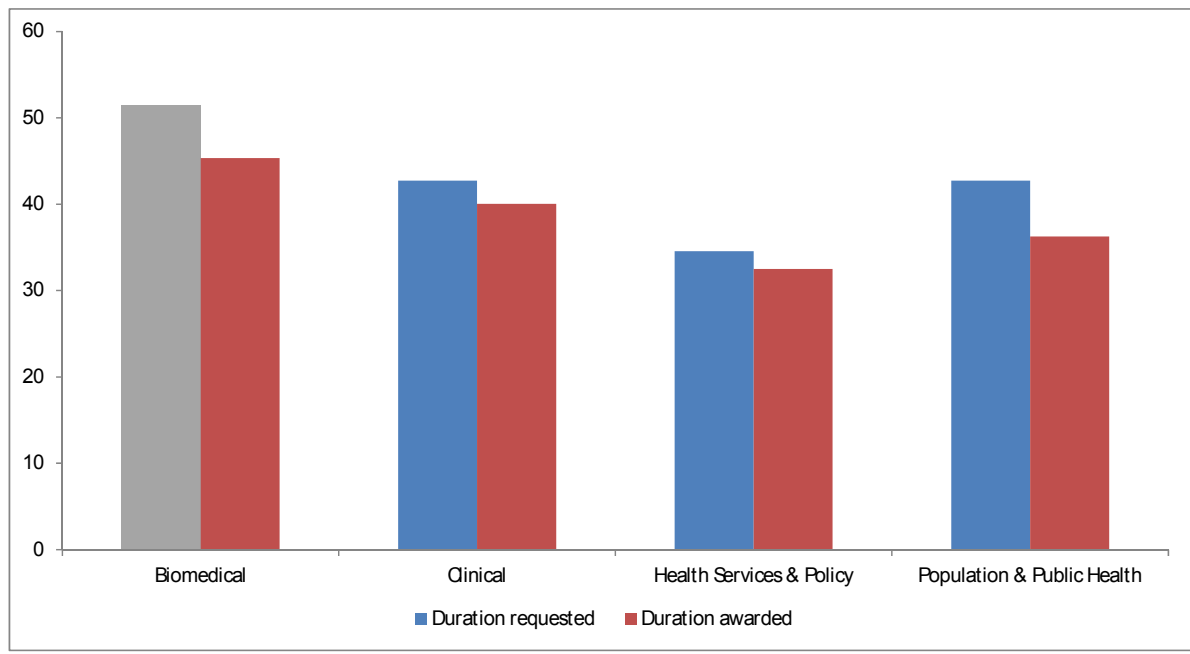

For Peer Review Only
